# Supplementary material
Source: ML conference proceedings conference paper supplement (https://openaccess.thecvf.com/content/ICCV2023/html/Park_Nearest_Neighbor_Guidance_ICCV_2023_paper.html)
Supplement: Supplementary file 1 [file Park_Nearest_Neighbor_Guidance_ICCV_2023_supplemental.pdf]

## A. Supplementary to Method

Here, we provide the proof for Proposition 1

### Proposition 1.

(a) If  $\min_i \|\widehat{\phi}(\mathbf{x}) - \widehat{\mathbf{z}}_i\|_2 \geq 2$ , then  $S(\mathbf{x}) \leq 0$ .

(b) Suppose  $\max_{i \leq k} \|\widehat{\phi}(\mathbf{x}) - \widehat{\mathbf{z}}_{(i)}\|_2 < \epsilon$ . If  $\min_{i \leq k} s_{(i)} > M$ , then

$$S(\mathbf{x}) > M(S_{base}(\mathbf{x}) - \epsilon/2) \quad (5)$$

On the other hand, if  $\max_{i \leq k} s_{(i)} \leq \delta$ , then

$$S(\mathbf{x}) \leq \delta S_{base}(\mathbf{x}) \quad (6)$$

*Proof.* (a) Note that

$$\|\widehat{\phi}(\mathbf{x}) - \widehat{\mathbf{z}}_i\|_2 = 2 - 2 \text{sim}(\mathbf{z}_i, \mathbf{z}). \quad (7)$$

Hence, if  $\min_i \|\widehat{\phi}(\mathbf{x}) - \widehat{\mathbf{z}}_i\|_2 > 2$ , then  $\max_i \text{sim}(\mathbf{z}_i, \mathbf{z}) \leq 0$ . Therefore,

$$S(\mathbf{x}) = S_{base}(\mathbf{x}) \cdot \frac{1}{k} \sum_{i=1}^k s_{(i)} \text{sim}(\mathbf{z}_{(i)}, \mathbf{z}) \leq S_{base}(\mathbf{x}) \cdot 0. \quad (8)$$

(b) Assume  $\max_{i \leq k} \|\widehat{\phi}(\mathbf{x}) - \widehat{\mathbf{z}}_{(i)}\|_2 < \epsilon$ . Then,  $\text{sim}(\mathbf{z}_{(i)}, \mathbf{z}) \geq 1 - \epsilon/2$  due to (7). Therefore, if  $\min_{i \leq k} s_{(i)} > M$

$$S(\mathbf{x}) = S_{base}(\mathbf{x}) \frac{1}{k} \sum_{i=1}^k s_{(i)} \text{sim}(\mathbf{z}_{(i)}, \mathbf{z}) \quad (9)$$

$$\geq S_{base}(\mathbf{x}) (1 - \epsilon/2) \frac{1}{k} \sum_{i=1}^k s_{(i)} \quad (10)$$

$$> S_{base}(\mathbf{x}) (1 - \epsilon/2) \frac{1}{k} k M \quad (11)$$

$$= M S_{base}(\mathbf{x}) (1 - \epsilon/2). \quad (12)$$

$$(13)$$

On the other hand, if  $\max_{i \leq k} s_{(i)} \leq \delta$ , then

$$S(\mathbf{x}) = S_{base}(\mathbf{x}) \frac{1}{k} \sum_{i=1}^k s_{(i)} \text{sim}(\mathbf{z}_{(i)}, \mathbf{z}) \leq S_{base}(\mathbf{x}) \frac{1}{k} k \delta \cdot 1 = \delta S_{base}(\mathbf{x}) \quad (14)$$

as  $\text{sim}(\mathbf{z}_{(i)}, \mathbf{z}) \leq 1$ . This completes the proof.  $\square$

**Corollary 2.** Consider  $\mathbf{x}_h$  and  $\mathbf{x}_l$  such that

$$s_{(1)_h} \text{sim}(\mathbf{z}_{(1)_h}, \mathbf{z}_h) \geq \dots \geq s_{(n)_h} \text{sim}(\mathbf{z}_{(n)_h}, \mathbf{z}_h). \quad (15)$$

and

$$s_{(1)_l} \text{sim}(\mathbf{z}_{(1)_l}, \mathbf{z}_l) \geq \dots \geq s_{(n)_l} \text{sim}(\mathbf{z}_{(n)_l}, \mathbf{z}_l). \quad (16)$$

where  $\mathbf{z}_h = \phi(\mathbf{x}_h)$  and  $\mathbf{z}_l = \phi(\mathbf{x}_l)$ . Suppose  $\max_{i \leq k} \|\widehat{\phi}(\mathbf{x}_h) - \widehat{\mathbf{z}}_{(i)_h}\|_2 < \epsilon$  and  $\max_{i \leq k} \|\widehat{\phi}(\mathbf{x}_l) - \widehat{\mathbf{z}}_{(i)_l}\|_2 < \epsilon$ . Suppose  $\min_{i \leq k} s_{(i)_h}(\mathbf{x}_h) > M$  and  $\max_{i \leq k} s_{(i)_l}(\mathbf{x}_h) \leq \delta$ . Then,

$$\frac{S(\mathbf{x}_h)}{S_{base}(\mathbf{x}_h)} > \frac{S(\mathbf{x}_l)}{S_{base}(\mathbf{x}_l)} \quad (17)$$

if

$$M - \delta > \frac{\epsilon}{2S_{base}(\mathbf{x}_h)} \quad (18)$$

| Method      | OOD Model | iNaturalist |       |       | SUN   |       |       | Places |       |       | Textures |       |       | OpenImage-O |       |       | Average      |              |              |
|-------------|-----------|-------------|-------|-------|-------|-------|-------|--------|-------|-------|----------|-------|-------|-------------|-------|-------|--------------|--------------|--------------|
|             |           | FPR         | AUROC | AUPR  | FPR   | AUROC | AUPR  | FPR    | AUROC | AUPR  | FPR      | AUROC | AUPR  | FPR         | AUROC | AUPR  | FPR          | AUROC        |              |
| MSP         | ResNet-50 | 29.74       | 93.78 | 98.59 | 59.54 | 84.56 | 95.69 | 60.94  | 84.28 | 95.92 | 50.02    | 84.90 | 97.45 | 47.44       | 89.68 | 95.90 | 49.54        | 87.44        | 96.71        |
| MaxLogit    | ResNet-50 | 22.06       | 95.99 | 99.15 | 50.90 | 88.43 | 96.99 | 53.78  | 87.37 | 96.79 | 42.25    | 88.42 | 97.90 | 41.63       | 92.23 | 97.04 | 42.12        | 90.49        | 97.57        |
| KL          | ResNet-50 | 20.98       | 96.17 | 99.19 | 47.06 | 88.91 | 97.08 | 51.15  | 87.70 | 96.85 | 39.31    | 88.90 | 97.96 | 41.57       | 92.32 | 97.06 | 40.01        | 90.80        | 97.63        |
| ViM         | ResNet-50 | 16.68       | 96.87 | 99.35 | 39.34 | 90.86 | 97.56 | 49.21  | 88.48 | 97.03 | 15.87    | 94.21 | 98.77 | 28.18       | 94.59 | 97.94 | 29.86        | <b>93.00</b> | <b>98.13</b> |
| Mahalanobis | ResNet-50 | 35.04       | 94.79 | 98.94 | 64.99 | 86.55 | 96.73 | 70.31  | 83.92 | 96.00 | 15.02    | 95.52 | 99.29 | 37.52       | 93.89 | 97.84 | 44.58        | 90.93        | 97.76        |
| SSD         | ResNet-50 | 33.76       | 94.64 | 98.89 | 56.04 | 88.35 | 97.14 | 65.12  | 84.52 | 96.06 | 11.81    | 96.54 | 99.45 | 37.97       | 93.29 | 97.56 | 40.94        | 91.47        | 97.82        |
| Gradnorm    | ResNet-50 | 13.70       | 97.24 | 99.41 | 28.75 | 93.34 | 98.34 | 37.73  | 91.04 | 97.71 | 28.69    | 91.88 | 98.55 | 35.75       | 91.50 | 96.46 | 28.92        | 93.00        | 98.09        |
| KNN         | ResNet-50 | 37.53       | 93.86 | 98.67 | 54.57 | 86.98 | 96.71 | 63.34  | 83.54 | 95.68 | 17.45    | 94.13 | 99.00 | 40.77       | 92.46 | 97.15 | 42.73        | 90.19        | 97.44        |
| Energy      | ResNet-50 | 20.98       | 96.17 | 99.19 | 47.05 | 88.91 | 97.08 | 51.15  | 87.70 | 96.85 | 39.31    | 88.90 | 97.96 | 41.56       | 92.32 | 97.06 | 40.01        | 90.80        | 97.63        |
| NNGuide     | ResNet-50 | 12.02       | 97.47 | 99.43 | 31.62 | 91.66 | 97.63 | 38.88  | 90.12 | 97.34 | 24.93    | 91.52 | 98.27 | 31.60       | 93.66 | 97.47 | <b>27.81</b> | <b>92.89</b> | <b>98.03</b> |
| MSP         | MobileNet | 72.65       | 84.01 | 96.27 | 81.78 | 76.49 | 93.90 | 81.39  | 76.23 | 93.83 | 73.90    | 78.51 | 96.43 | 75.47       | 82.04 | 92.83 | 77.04        | 79.46        | 94.65        |
| MaxLogit    | MobileNet | 76.24       | 81.80 | 95.62 | 83.00 | 74.88 | 93.31 | 82.48  | 74.72 | 93.28 | 73.55    | 77.66 | 96.21 | 75.03       | 80.90 | 92.06 | 78.06        | 77.99        | 94.10        |
| KL          | MobileNet | 91.93       | 67.88 | 91.98 | 94.36 | 65.80 | 91.02 | 93.16  | 66.26 | 91.10 | 80.28    | 71.55 | 95.19 | 83.78       | 72.78 | 88.50 | 88.70        | 68.85        | 91.56        |
| ViM         | MobileNet | 86.86       | 69.57 | 92.14 | 88.67 | 66.37 | 90.80 | 92.16  | 62.43 | 89.56 | 40.71    | 89.59 | 98.34 | 72.95       | 80.01 | 91.79 | 76.27        | 73.59        | 92.53        |
| Mahalanobis | MobileNet | 66.86       | 82.62 | 95.80 | 80.01 | 72.49 | 92.61 | 86.51  | 67.54 | 91.02 | 31.95    | 92.54 | 98.85 | 59.00       | 86.26 | 94.53 | <b>64.87</b> | <b>80.29</b> | <b>94.56</b> |
| SSD         | MobileNet | 86.34       | 64.32 | 89.37 | 88.42 | 61.87 | 88.52 | 93.24  | 53.99 | 85.57 | 41.68    | 90.45 | 98.67 | 79.21       | 74.42 | 88.79 | 77.78        | 69.01        | 90.18        |
| Gradnorm    | MobileNet | 94.24       | 62.85 | 90.08 | 93.66 | 63.23 | 89.80 | 95.24  | 60.18 | 88.83 | 78.56    | 73.61 | 95.79 | 87.69       | 66.52 | 84.91 | 89.88        | 65.28        | 89.88        |
| KNN         | MobileNet | 81.76       | 75.73 | 94.17 | 91.17 | 66.04 | 90.96 | 92.62  | 62.02 | 89.56 | 35.80    | 90.87 | 98.50 | 69.87       | 81.43 | 92.54 | 74.24        | 75.22        | 93.14        |
| Energy      | MobileNet | 91.92       | 67.88 | 91.98 | 94.36 | 65.80 | 91.02 | 93.16  | 66.26 | 91.10 | 80.28    | 71.55 | 95.19 | 83.78       | 72.78 | 88.50 | 88.70        | 68.85        | 91.56        |
| NNGuide     | MobileNet | 68.24       | 82.07 | 95.69 | 79.57 | 76.10 | 93.86 | 81.87  | 74.23 | 93.19 | 38.78    | 89.32 | 98.18 | 61.16       | 84.58 | 93.77 | 65.92        | <b>81.26</b> | <b>94.94</b> |
| MSP         | ViT       | 27.58       | 93.96 | 98.63 | 57.43 | 85.18 | 96.36 | 61.13  | 84.34 | 96.12 | 53.21    | 84.96 | 97.61 | 44.32       | 89.89 | 95.95 | 48.74        | 87.67        | 96.94        |
| MaxLogit    | ViT       | 13.19       | 97.19 | 99.37 | 47.45 | 86.80 | 96.43 | 54.36  | 83.13 | 95.20 | 44.70    | 86.11 | 97.52 | 28.41       | 93.23 | 97.02 | 37.62        | 89.29        | 97.11        |
| KL          | ViT       | 12.64       | 97.34 | 99.40 | 48.05 | 86.47 | 96.33 | 56.41  | 82.22 | 94.93 | 46.79    | 85.72 | 97.47 | 28.33       | 93.31 | 97.04 | 38.44        | 89.01        | 97.03        |
| ViM         | ViT       | 3.42        | 99.20 | 99.82 | 49.66 | 88.05 | 96.86 | 59.69  | 83.68 | 95.58 | 42.55    | 88.46 | 98.11 | 20.50       | 95.79 | 98.29 | 35.16        | 91.04        | 97.73        |
| Mahalanobis | ViT       | 4.94        | 98.85 | 99.74 | 58.77 | 88.15 | 97.07 | 65.62  | 85.46 | 96.45 | 43.49    | 90.30 | 98.60 | 23.87       | 95.92 | 98.53 | 39.34        | 91.73        | 98.08        |
| SSD         | ViT       | 11.19       | 97.50 | 99.43 | 84.91 | 70.87 | 92.07 | 88.23  | 65.10 | 90.29 | 69.38    | 79.81 | 96.69 | 45.01       | 88.62 | 95.24 | 59.74        | 80.38        | 94.74        |
| Gradnorm    | ViT       | 14.06       | 96.62 | 99.14 | 46.68 | 86.60 | 96.09 | 56.70  | 82.84 | 94.95 | 43.37    | 87.73 | 97.89 | 29.41       | 92.63 | 96.50 | 38.04        | 89.28        | 96.91        |
| KNN         | ViT       | 29.46       | 94.07 | 98.64 | 72.15 | 83.88 | 95.76 | 74.17  | 81.47 | 95.36 | 51.21    | 87.18 | 98.06 | 45.25       | 91.49 | 96.81 | 54.45        | 87.62        | 96.93        |
| Energy      | ViT       | 12.64       | 97.34 | 99.40 | 48.05 | 86.47 | 96.33 | 56.41  | 82.22 | 94.93 | 46.79    | 85.72 | 97.47 | 28.33       | 93.31 | 97.04 | 38.44        | 89.01        | 97.03        |
| NNGuide     | ViT       | 9.17        | 97.96 | 99.55 | 45.64 | 90.03 | 97.48 | 53.82  | 87.25 | 96.75 | 39.26    | 90.01 | 98.42 | 23.11       | 95.47 | 98.28 | <b>34.20</b> | <b>92.14</b> | <b>98.10</b> |
| MSP         | RegNet    | 23.62       | 94.64 | 98.75 | 52.53 | 86.58 | 96.70 | 56.83  | 85.13 | 96.32 | 49.22    | 86.47 | 97.97 | 34.65       | 91.94 | 96.75 | 43.37        | 88.95        | 97.30        |
| MaxLogit    | RegNet    | 7.79        | 98.03 | 99.52 | 31.68 | 91.55 | 97.79 | 41.05  | 88.08 | 96.78 | 32.73    | 91.19 | 98.64 | 16.76       | 95.68 | 98.06 | 26.00        | 92.91        | 98.16        |
| KL          | RegNet    | 6.58        | 98.29 | 99.58 | 29.46 | 91.85 | 97.84 | 40.71  | 87.89 | 96.70 | 30.87    | 91.51 | 98.68 | 16.10       | 95.83 | 98.10 | 24.74        | 93.07        | 98.18        |
| ViM         | RegNet    | 1.97        | 99.52 | 99.90 | 28.19 | 93.15 | 98.30 | 42.72  | 89.05 | 97.26 | 20.53    | 95.58 | 99.40 | 13.55       | 97.15 | 98.87 | 21.39        | 94.89        | 98.74        |
| Mahalanobis | RegNet    | 2.22        | 99.36 | 99.87 | 49.30 | 89.85 | 97.54 | 61.84  | 85.77 | 96.54 | 27.91    | 93.90 | 99.15 | 19.50       | 96.48 | 98.71 | 32.15        | 93.07        | 98.36        |
| SSD         | RegNet    | 5.09        | 98.82 | 99.76 | 60.33 | 85.88 | 96.55 | 70.87  | 80.27 | 95.08 | 38.14    | 92.58 | 99.01 | 28.75       | 93.54 | 97.43 | 40.64        | 90.22        | 97.57        |
| Gradnorm    | RegNet    | 87.58       | 57.01 | 87.08 | 82.97 | 65.84 | 90.21 | 91.01  | 56.04 | 86.70 | 74.81    | 75.63 | 96.20 | 77.95       | 60.39 | 78.62 | 82.86        | 62.98        | 87.76        |
| KNN         | RegNet    | 4.30        | 98.76 | 99.73 | 46.12 | 88.45 | 96.69 | 56.28  | 85.15 | 96.11 | 28.33    | 91.93 | 98.72 | 21.26       | 95.51 | 98.28 | 31.26        | 91.96        | 97.91        |
| Energy      | RegNet    | 6.68        | 98.28 | 99.57 | 29.41 | 91.88 | 97.85 | 40.51  | 87.97 | 96.72 | 30.85    | 91.48 | 98.68 | 16.19       | 95.81 | 98.09 | 24.73        | 93.08        | 98.18        |
| NNGuide     | RegNet    | 1.83        | 99.57 | 99.90 | 21.58 | 94.43 | 98.58 | 31.47  | 91.87 | 97.92 | 17.00    | 95.82 | 99.42 | 10.79       | 97.73 | 99.09 | <b>16.53</b> | <b>95.89</b> | <b>98.98</b> |

Table 6. Results on ImageNet-1k (ID) across five different OODs (*i.e.* iNaturalist, SUN, Places, Textures, OpenImage-O).

*Proof.* Note that we have (5) and (6). Thus, we have

$$\frac{S(\mathbf{x}_h)}{S_{base}(\mathbf{x}_h)} > \frac{M(S_{base}(\mathbf{x}_h) - \epsilon/2)}{S_{base}(\mathbf{x}_h)} \geq \frac{\delta S_{base}(\mathbf{x}_l)}{S_{base}(\mathbf{x}_l)} \geq \frac{S(\mathbf{x}_l)}{S_{base}(\mathbf{x}_l)} \quad (19)$$

if and only if

$$M - \delta - \frac{\epsilon}{2S_{base}(\mathbf{x}_h)} > 0 \quad (20)$$

which is equivalent to  $M - \delta > \frac{\epsilon}{2S_{base}(\mathbf{x}_h)}$ . This completes the proof.  $\square$

Corollary 2 states the following: Consider  $\mathbf{x}_h$  in a high confidence region, and  $\mathbf{x}_l$  in a relatively lower confidence region. Assume both  $\mathbf{x}_h$  and  $\mathbf{x}_l$  are near to the train ID data (*i.e.* bank set). Then, the incremental factor is higher on  $\mathbf{x}_h$  than  $\mathbf{x}_l$  if  $\mathbf{x}_h$  if the nearest neighbors to  $\mathbf{x}_h$  have sufficiently high confidence.

## B. Supplementary to Experiments

### B.1. Evaluation on ImageNet-1k

**Backbone models** We evaluate detection scores on four different model architectures ResNet-50 [12], MobileNet [30], ViT [9], and RegNet [27].

- We use ResNet-50 trained on ImageNet-1k from scratch. The model can be downloaded from <https://github.com/deeplearning-wisc/knn-ood> in ‘Pre-trained model’.
- We use MobileNet-v2 trained on ImageNet-1k from scratch. The model can be downloaded from [https://pytorch.org/vision/stable/models/generated/torchvision.models.mobilenet\\_v2.html#torchvision.models.MobileNet\\_V2\\_Weights](https://pytorch.org/vision/stable/models/generated/torchvision.models.mobilenet_v2.html#torchvision.models.MobileNet_V2_Weights).

| Detection method    | iNaturalist |       |       | SUN   |       |       | Places |       |       | Textures |       |       | OpenImage-O |       |       | Average on first four |       |       | Average on all |       |       |
|---------------------|-------------|-------|-------|-------|-------|-------|--------|-------|-------|----------|-------|-------|-------------|-------|-------|-----------------------|-------|-------|----------------|-------|-------|
|                     | FPR95       | AUROC | AUPR  | FPR95 | AUROC | AUPR  | FPR95  | AUROC | AUPR  | FPR95    | AUROC | AUPR  | FPR95       | AUROC | AUPR  | FPR95                 | AUROC | AUPR  | FPR95          | AUROC | AUPR  |
| ODIN*               | 47.66       | 89.66 | -     | 60.15 | 84.59 | -     | 67.89  | 81.78 | -     | 50.23    | 85.62 | -     | -           | -     | -     | 56.48                 | 85.41 | -     | -              | -     | -     |
| GODIN*              | 61.91       | 85.40 | -     | 60.83 | 85.60 | -     | 63.70  | 83.81 | -     | 77.85    | 73.27 | -     | -           | -     | -     | 66.07                 | 82.02 | -     | -              | -     | -     |
| DICE*               | 25.63       | 94.49 | -     | 35.15 | 90.83 | -     | 46.49  | 87.48 | -     | 31.72    | 90.30 | -     | -           | -     | -     | 34.75                 | 90.78 | -     | -              | -     | -     |
| RankFeat*           | 41.31       | 91.91 | -     | 29.27 | 94.07 | -     | 39.34  | 90.93 | -     | 37.29    | 91.70 | -     | -           | -     | -     | 36.80                 | 92.15 | -     | -              | -     | -     |
| BATS*               | 12.57       | 97.67 | -     | 22.62 | 95.33 | -     | 34.34  | 91.83 | -     | 38.90    | 92.27 | -     | -           | -     | -     | 27.11                 | 94.28 | -     | -              | -     | -     |
| ASH*                | 14.21       | 97.32 | -     | 22.08 | 95.10 | -     | 33.45  | 92.31 | -     | 21.17    | 95.50 | -     | -           | -     | -     | 22.73                 | 95.06 | -     | -              | -     | -     |
| ReAct* (+ Energy)   | 20.38       | 96.22 | -     | 24.20 | 94.20 | -     | 33.85  | 91.58 | -     | 47.30    | 89.80 | -     | -           | -     | -     | 31.43                 | 92.95 | -     | -              | -     | -     |
| ReAct + MSP         | 44.36       | 91.62 | 98.17 | 58.46 | 86.43 | 96.65 | 63.83  | 84.51 | 96.18 | 56.24    | 86.51 | 98.01 | 57.04       | 88.40 | 95.64 | 55.72                 | 87.27 | 97.25 | 55.99          | 87.49 | 96.93 |
| ReAct + MaxLogit    | 26.47       | 95.29 | 99.00 | 39.83 | 91.74 | 98.04 | 48.18  | 89.44 | 97.42 | 45.41    | 90.75 | 98.72 | 44.82       | 91.54 | 96.88 | 39.97                 | 91.80 | 98.29 | 40.94          | 91.75 | 98.01 |
| ReAct + KL          | 19.99       | 96.31 | 99.21 | 29.67 | 93.40 | 98.38 | 39.70  | 90.95 | 97.71 | 41.42    | 91.62 | 98.84 | 41.54       | 91.85 | 96.93 | 32.69                 | 93.07 | 98.54 | 34.46          | 92.82 | 98.21 |
| ReAct + ViM         | 18.87       | 96.69 | 99.32 | 32.39 | 93.82 | 98.60 | 45.45  | 90.38 | 97.67 | 7.55     | 98.45 | 99.81 | 38.72       | 92.34 | 97.15 | 26.06                 | 94.83 | 98.85 | 28.60          | 94.33 | 98.51 |
| ReAct + Mahalanobis | 44.96       | 91.44 | 98.14 | 62.50 | 84.64 | 96.37 | 73.04  | 79.23 | 94.80 | 11.10    | 97.78 | 99.72 | 55.98       | 85.90 | 94.33 | 47.90                 | 88.27 | 97.26 | 49.52          | 87.80 | 96.67 |
| ReAct + SSD         | 56.83       | 86.00 | 96.65 | 71.06 | 79.56 | 94.79 | 80.38  | 73.08 | 92.67 | 16.40    | 96.45 | 99.53 | 65.70       | 78.79 | 90.01 | 56.17                 | 83.77 | 95.91 | 58.07          | 82.78 | 94.73 |
| ReAct + GradNorm    | 14.88       | 97.01 | 99.33 | 25.54 | 94.19 | 98.57 | 36.49  | 91.12 | 97.74 | 23.60    | 94.57 | 99.23 | 39.46       | 89.67 | 95.46 | 25.13                 | 94.22 | 98.72 | 27.99          | 93.31 | 98.07 |
| ReAct + KNN         | 37.05       | 93.03 | 98.49 | 55.73 | 86.11 | 96.58 | 67.99  | 80.70 | 95.04 | 8.92     | 98.01 | 99.74 | 53.02       | 88.26 | 95.43 | 42.42                 | 89.46 | 97.46 | 44.54          | 89.22 | 97.06 |
| ReAct + Energy      | 19.99       | 96.31 | 99.21 | 29.67 | 93.40 | 98.38 | 39.70  | 90.95 | 97.71 | 41.42    | 91.62 | 98.84 | 41.54       | 91.85 | 96.93 | 32.69                 | 93.07 | 98.54 | 34.46          | 92.82 | 98.21 |
| ReAct + NNGuide     | 11.12       | 97.70 | 99.50 | 20.51 | 95.26 | 98.83 | 29.99  | 92.70 | 98.13 | 17.27    | 96.11 | 99.46 | 35.10       | 92.49 | 97.09 | 19.72                 | 95.45 | 98.98 | 22.80          | 94.85 | 98.60 |

Table 7. Results on ImageNet-1k with the network truncators.

- We use ViT-B/16 pretrained on ImageNet-21k and then fine-tuned on ImageNet-1k with the full weight update. The model can be downloaded from [https://pytorch.org/vision/stable/models/generated/torchvision.models.vit\\_b\\_16.html#torchvision.models.ViT\\_B\\_16\\_Weights](https://pytorch.org/vision/stable/models/generated/torchvision.models.vit_b_16.html#torchvision.models.ViT_B_16_Weights).
- We use RegNet-Y-16GF pretrained on ImageNet-21k and then fine-tuned on ImageNet-1k with the full weight update. The model can be downloaded from [https://pytorch.org/vision/stable/models/generated/torchvision.models.regnet\\_y\\_16gf.html#torchvision.models.RegNet\\_Y\\_16GF\\_Weights](https://pytorch.org/vision/stable/models/generated/torchvision.models.regnet_y_16gf.html#torchvision.models.RegNet_Y_16GF_Weights).

### B.1.1 Comparison of detection scores

**Results** The result on the ImageNet-1k OOD benchmark is given in Tab. 6.

### B.1.2 Compatibility with network truncator

## B.2. Evaluation against natural distribution shift (ImageNet-1k-V2)

**Dataset** ImageNet-1k-V2 [36, 28] contains samples of the same semantic classes as those of original ImageNet-1k. Due to the different data collecting schemes applied on ImageNet-1k-V2, the data experiences natural distribution shift. The dataset involves three different data folds. Their differing characteristics are determined by how they are collected. We evaluate the performance by combining the different folds.

**Backbone models** We use the same backbone models used in the ImageNet-1k benchmark.

**Setup** The model is trained on the train fold of original ImageNet-1k. Then, during testing, the test set ID is the combined ImageNet-1k-V2 folds, and the test OOD is either of five different OODs (*i.e.*, iNaturalist, SUN, Places, Textures, and OpenImage-O).

**Results** The results on the ImageNet-1k-V2 are given in Tab. 8.

### B.3. Evaluation on the CIFAR-100 benchmark

**Backbone model** A standard ResNet-18 model with the default PyTorch configuration is trained on the train fold of CIFAR-100 from scratch for 200 epochs with the SGD optimizer. We select the best model by the validation set accuracy.

**Results** The results on the CIFAR-100 OOD benchmark is given in Tab. 9.

### B.4. Ablation

#### B.4.1 Compatibility to other classifier-based confidence scores

**Note** Note that the all confidence scores we use have their range in  $[0, \infty)$ . Particularly, the MaxLogit and Energy confidence scores satisfy this range as long as the maximum unit of the logit is greater than or equal to 0.





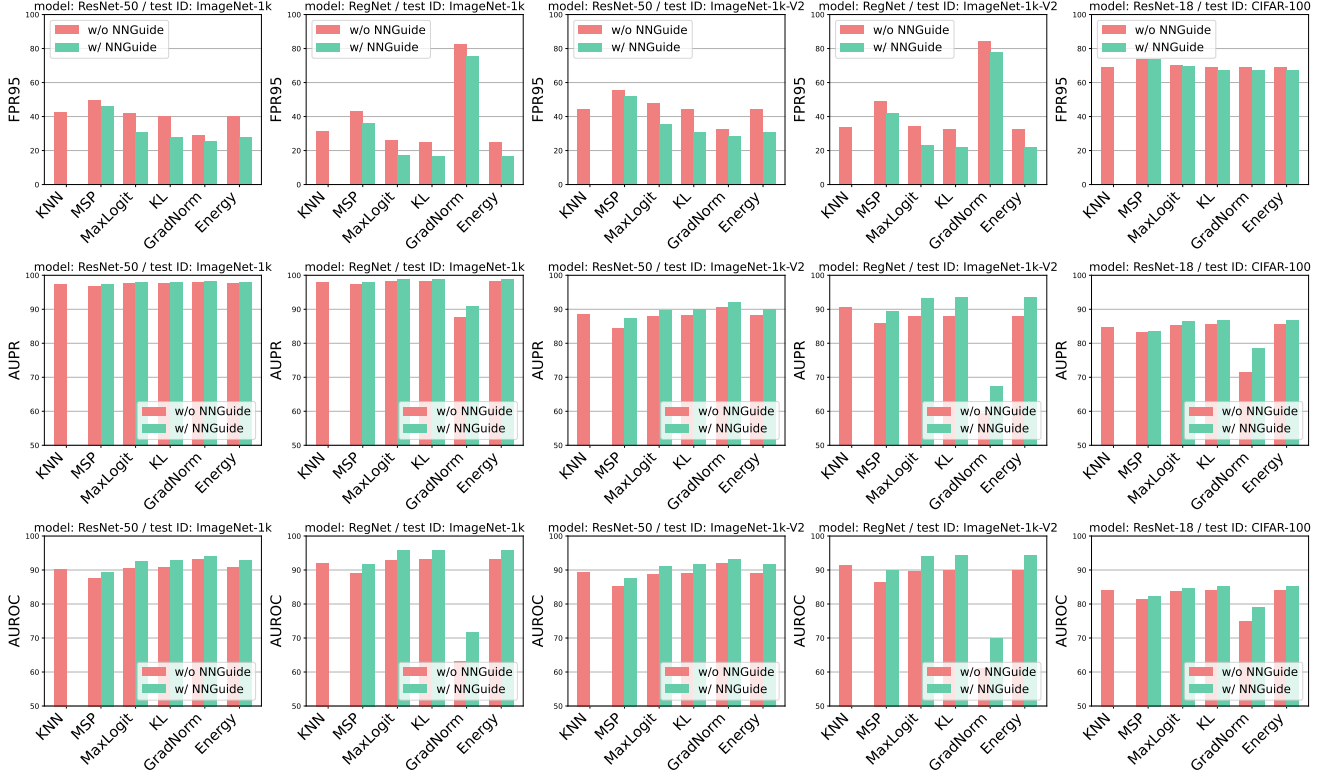

Figure 7. The compatibility to other classifier-based scores. The average performance across five different OODs is reported.

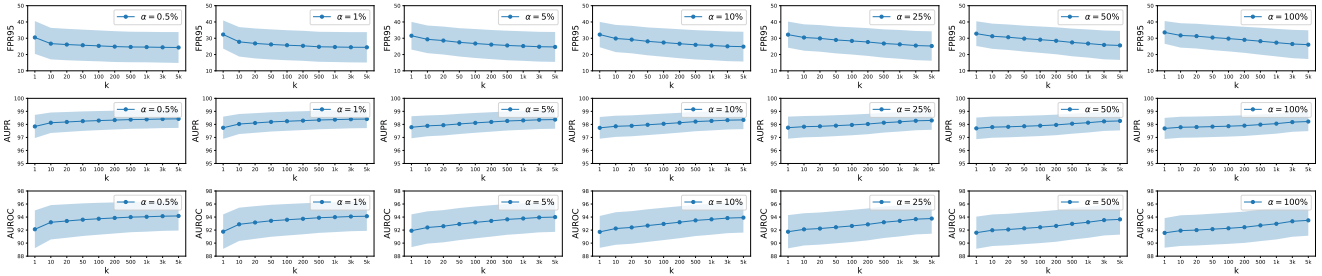

Figure 8. The performance of NNGuide across the number  $k$  of nearest neighbors and the sampling ratio  $\alpha$ .

- **Guidance-term only:** In this case, the score function in utilization is

$$S_{\text{guide-only}}(\mathbf{x}) = G(\mathbf{x}) \quad (26)$$

where  $G(\mathbf{x})$  is the nearest-neighbor guidance term given in (3).

- **Without confidence scaling:** In this case, the detection score function is computed by without the scaling term in the nearest neighbor similarities. Namely,

$$S_{\text{w/o-scale}}(\mathbf{x}) = S_{\text{base}}(\mathbf{x}) \cdot G_{\text{w/o-scale}}(\mathbf{x}) \quad (27)$$

where  $G_{\text{w/o-scale}}(\mathbf{x}) = S_{\text{KNN-avg}}(\mathbf{x})$  as given in (23).

**Results** We perform ablation study on the NNGuide components on both ImageNet-1k and ImageNet-1k-V2 across ResNet-18 and RegNet. The results are given in Tab. 10 and 11.

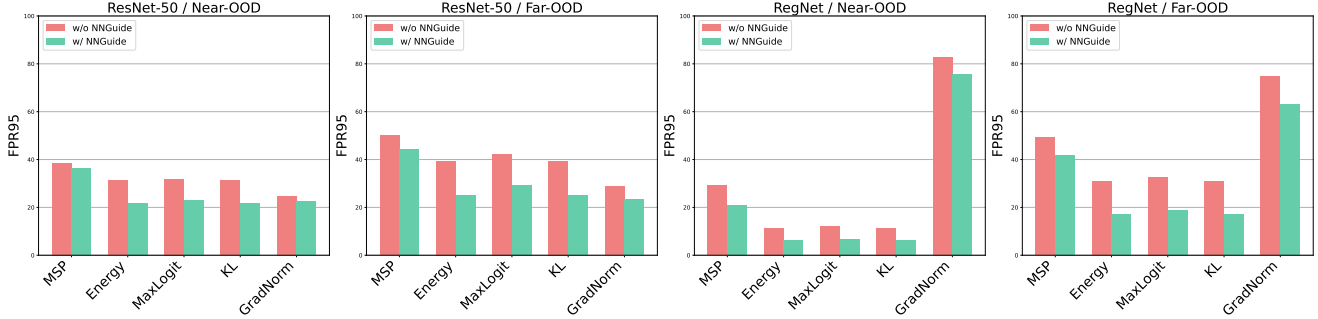

Figure 9. The improvement by our proposed nearest neighbor guidance against far-OOD data (Textures) and near-OOD data (iNaturalist and OpenImage-O). The ID data is ImageNet-1k and the model is ResNet-50.

|               | SVHN  |       | Places365 |       | iSUN  |       | Texture |       | LSUN  |       | AVG          |              |
|---------------|-------|-------|-----------|-------|-------|-------|---------|-------|-------|-------|--------------|--------------|
|               | FPR95 | AUROC | FPR95     | AUROC | FPR95 | AUROC | FPR95   | AUROC | FPR95 | AUROC | FPR95        | AUROC        |
| CIDER         | 21.42 | 94.87 | 82.16     | 67.32 | 63.75 | 82.25 | 32.96   | 92.49 | 9.38  | 98.13 | 41.93        | 87.01        |
| CIDER-NNGuide | 21.52 | 94.97 | 81.95     | 67.40 | 58.71 | 84.65 | 30.18   | 93.24 | 9.75  | 98.00 | <b>40.42</b> | <b>87.65</b> |

Table 12. The results of NNGuide with CIDER on CIFAR-100 (ID).

| OOD data   | KNN           | Energy        | ViM           | NNGuide-Energy | NNGuide-ViM          |
|------------|---------------|---------------|---------------|----------------|----------------------|
| ImageNet-O | 51.90 / 89.16 | 41.30 / 90.46 | 36.75 / 92.55 | 41.65 / 91.04  | <b>33.10 / 92.96</b> |

Table 13. The result of NNGuide with ViM on ImageNet-O in (FPR95↓ / AUROC↑). Here, ID is the ImageNet-1k.

### B.4.3 Analysis of the hyperparameters

Fig. 8 indicates the full analysis of the nearest neighbor hyperparameters  $\alpha$  and  $k$ .

### B.4.4 Dataset analysis: near-OOD vs far-OOD

Fig. 9 indicates that the nearest neighbor guidance improves the base confidence score against both far-OOD data (*i.e.* Textures) and near-OOD data (*i.e.* iNaturalist and OpenImage-O). Notably, the improvement is more significant against the far-OOD data. This is expected by Theorem 1. Overall, NNGuide achieves balanced robustness against both far-OOD and near-OOD.

## C. Additional Experiments

### C.1. Experiments with CIDER

To analyze the compatibility of NNGuide with the state-of-the-art training method CIDER [25] that is particularly effective for the KNN score, we implemented NNGuide based on the official Github repository of CIDER<sup>1</sup> using the provided model weights therefrom. Tab. 12 shows the performance of NNGuide with CIDER on CIFAR-100, indicating that NNGuide is compatible to CIDER. We note that, to compute base energy score for NNGuide, we defined the classifier weights by the class-wise means, and used  $k = 100$  with  $\alpha = 1\%$ .

### C.2. Experiments on ImageNet-O with ViM

To evaluate on ImageNet-O [16], we applied NNGuide on ViM utilizing the implementation from the official Github repository of ViM<sup>2</sup>. We used the ViT-B-P16-384 backbone from `mmcls` as it achieves the SOTA with ViM. Using the same provided ImageNet-1k train feature bankset with  $k=100$  and the sampling ratio  $\alpha = 10\%$ , we obtained the result in Tab. 13, where ‘NNGuide-Energy’ indicates the application of NNGuide with the base score being the negative energy (*i.e.*  $S_{base}(\mathbf{x}) = -\text{Energy}(\mathbf{x})$ ), while ‘NNGuide-ViM’ denotes NNGuide with the base score being ViM (*i.e.*  $S_{base}(\mathbf{x}) = -\text{ViM}(\mathbf{x})$ ). As the ImageNet-O is specifically designed to weaken the classifier-based confidence, both the vanilla Energy and our NNGuide-Energy perform poorly for OOD detection. For the ImageNet-O dataset, the integration of ViM with the ViT architecture proves to be exceptionally effective. The adversarial nature of ImageNet-O primarily targets classifier

<sup>1</sup><https://github.com/deeplearning-wisc/cider>

<sup>2</sup><https://github.com/vim/vim>

| Method  | near-OOD      |               |                    | far-OOD       |               |               |               |                   |
|---------|---------------|---------------|--------------------|---------------|---------------|---------------|---------------|-------------------|
|         | CIFAR-100     | TIN           | Average (near-OOD) | MNIST         | SVHN          | Texture       | Places365     | Average (far-OOD) |
| Energy  | 51.46 / 86.15 | 45.02 / 88.58 | 48.24 / 87.36      | 44.50 / 90.59 | 44.94 / 88.39 | 48.32 / 86.85 | 41.88 / 89.60 | 44.91 / 88.86     |
| KNN     | 52.49 / 89.55 | 46.66 / 91.41 | 49.58 / 90.48      | 50.08 / 91.63 | 33.32 / 95.13 | 46.01 / 92.77 | 43.78 / 91.82 | 43.30 / 92.83     |
| NNGuide | 51.54 / 86.64 | 43.99 / 89.07 | 47.77 / 87.86      | 47.43 / 89.82 | 43.64 / 89.62 | 46.91 / 88.44 | 40.62 / 90.39 | 44.65 / 89.57     |

Table 14. The result of NNGuide on CIFAR-10 (ID) in (FPR95↓ / AUROC↑)

confidence and convolutional networks. This makes the combination of ViT and ViM especially robust against ImageNet-O as ViT is non-convolutional and ViM does not rely solely on raw confidence. Accordingly, the result in Tab. 13 indicates that NNGuide’s effectiveness is significantly enhanced when used in conjunction with ViM.

### C.3. Experiments on CIFAR-10

NNGuide is particularly effective for large-scale data. For a small-scale data with few classes such as CIFAR-10, ID features are already well separated class-wise. Hence KNN can already well detect near-OOD in a fine-grained manner without NNGuide, indicated by its performance similar to Energy. The result shown in Tab. 14 (attained by using the official OpenOOD Github repository<sup>3</sup>) verifies our claim. Note that the above result is obtained with  $\alpha = 10\%$  and  $k = 10$ .

<sup>3</sup><https://github.com/Jingkang50/OpenOOD>
